# Supplementary material
Source: PubMed Central journal article supplement (PMC2695499)
Supplement: NIHMS106796-supplement-01.pdf [file NIHMS106796-supplement-01.pdf]

## SUPPLEMENTARY MATERIALS

Fig. S1

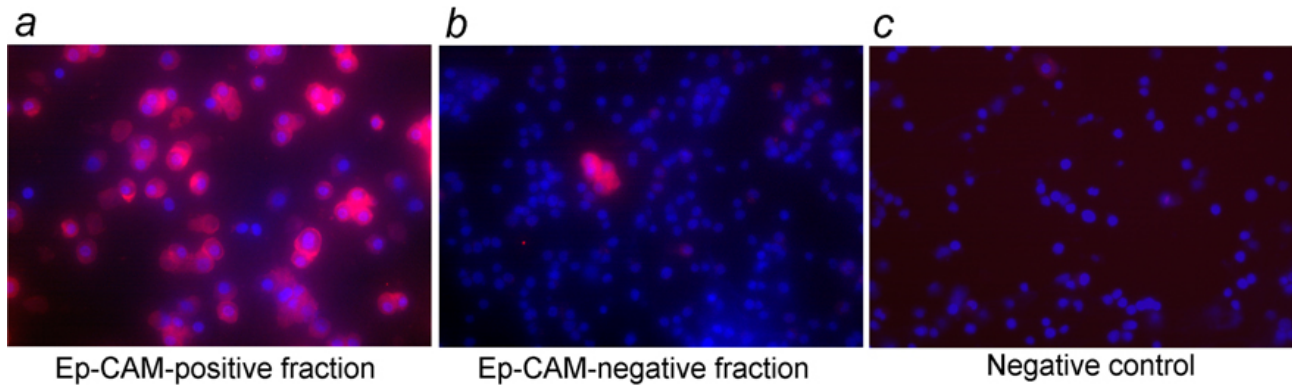

**Fig. S1. Ep-CAM staining in sorted cells.** (a) Ep-CAM-positive fraction showed Ep-CAM staining (red color) in  $84\pm 6\%$  cells. (b) Ep-CAM-negative fraction showed few Ep-CAM stained cells,  $9\pm 7\%$ ,  $p < 0.001$ . (c) Negative control without primary antibody showed no staining. Nuclei counterstained with DAPI. Orig. Mag. x 200. Cytospun cells were fixed in 4% paraformaldehyde in PBS for 10 min and blocked with 3% goat serum in PBS for 1 h before anti-EpCAM (MCA850H, Serotec Ltd. Raleigh, NC) for 1 h at room temperature. After three washes with PBS for 10 min each, rhodamine-conjugated mouse-specific goat IgG (1:300; #715-295-150, Jackson Immuno Research, West Grove, PA) was added for 1 h.

Fig. S2

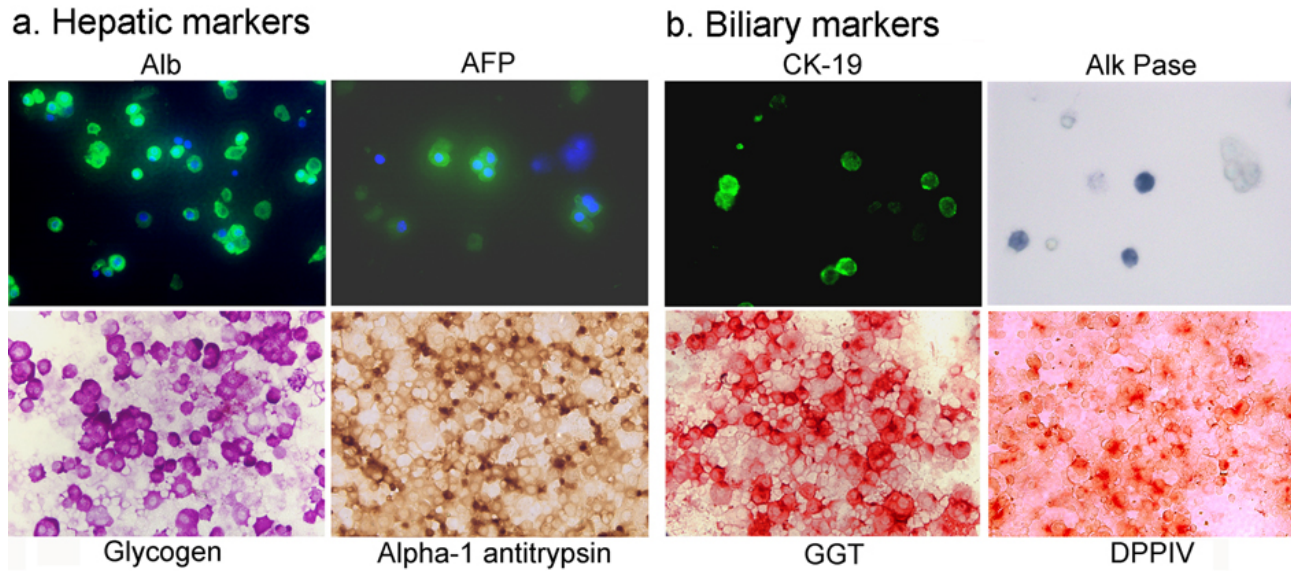

**Fig. S2. Immunohistochemical staining for specific liver markers in Ep-CAM-positive cells.** Shown are freshly isolated Ep-CAM-positive fetal liver cells with stainings for hepatic and biliary markers as indicated. Most cells expressed hepatic and biliary markers. Quantitative analysis of gene expression is given below in Table 4. Orig. Mag. x 200. Histochemical stainings for the hepatobiliary markers, glycogen, dipeptidyl peptidase IV (DPPIV),  $\gamma$ -glutamyltranspeptidase (GGT), and glucose-6-phosphatase (G-6-P), utilized published protocols.<sup>S8</sup> To colocalize glycogen and cytokeratin (CK)-19, cells were first immunostained for CK-19 and then stained for glycogen content.

Fig. S3

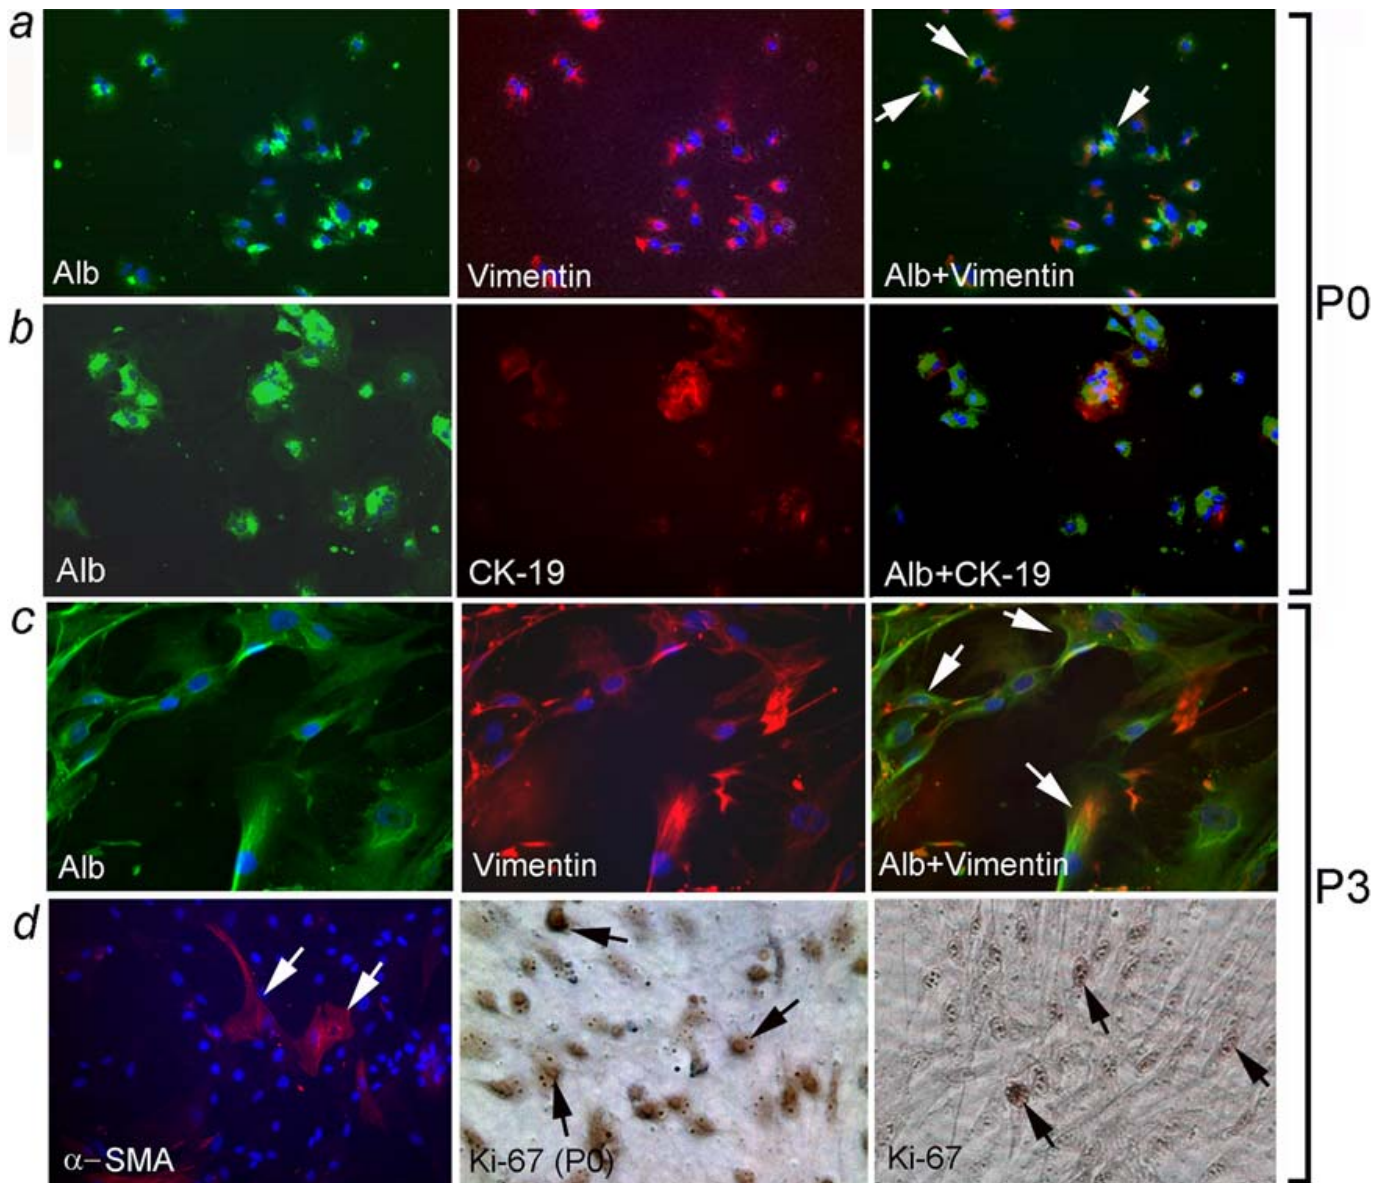

**Fig. S3. Phenotypic perturbation in cultured fetal cells.** Panels a, b and middle panel in d show primary cultures (P0) and panels c and d show cells passaged thrice (P3). Panels a-c, left, show albumin staining with green FITC signal. Middle panels in a-c show vimentin or CK-19 staining (red color, rhodamine), whereas panels on right show merged images. Panel d on left shows expression of  $\alpha$ -smooth muscle actin (red color). Middle and right panels in d show cell proliferation with Ki-67 immunostaining using DAB for visualization. DAPI nuclear counterstain, blue color, all other panels; Orig. Mag. x200.



Fig. S4

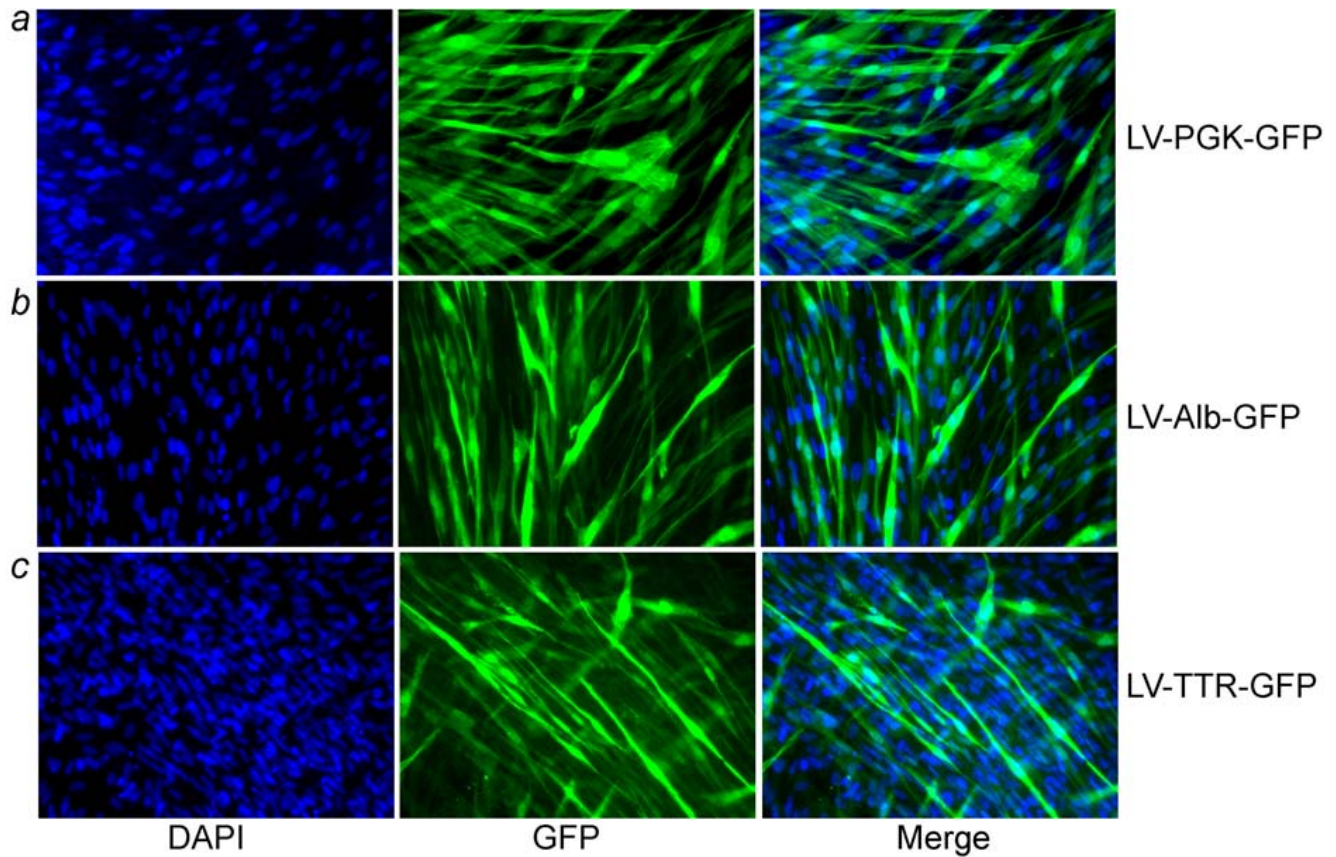

**Fig. S4. Efficiency of LV-transduction in cultured fetal cells.** Panels a, b and c show cells passaged once (P1) with transduction using LVs expressing GFP under PGK, Alb and TTR promoters, respectively. The panels show DAPI staining on left to visualize cell nuclei, GFP staining in the middle to demonstrate expression of the transgene and merged images on the right to show the extent of cell transduction. The majority of cells were transduced under the conditions used. Orig. Mag. x200.

Fig. S5

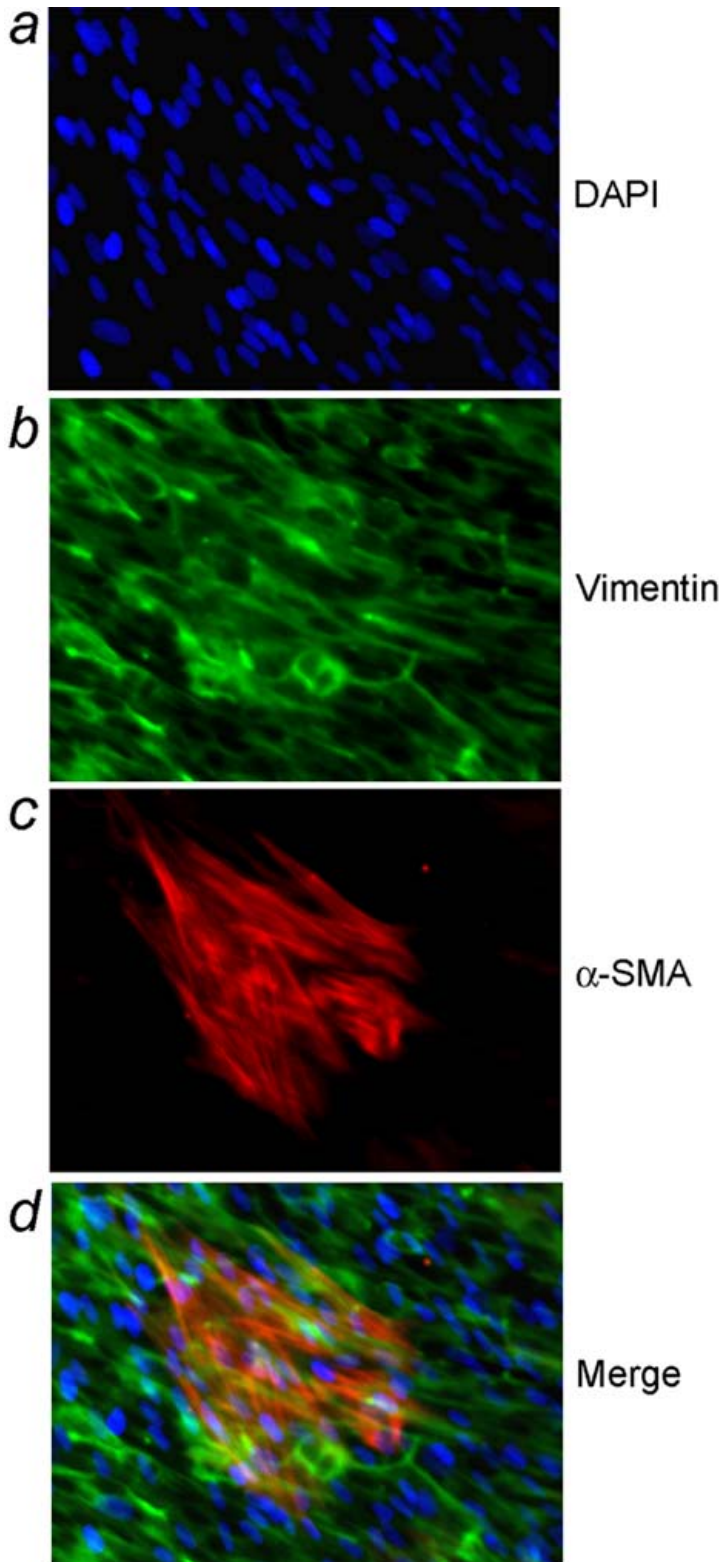

**Fig. S5. Differential regulation of vimentin and  $\alpha$ -SMA expression in cultured fetal liver cells.** The panels show DAPI staining of nuclei (a) and immunostaining for vimentin (b) or  $\alpha$ -SMA (c) with merged images (d) to demonstrate that while vimentin was expressed in all cells,  $\alpha$ -SMA was expressed in only some cells. Orig. Mag. x200.

Fig. S6

a. HGF signaling

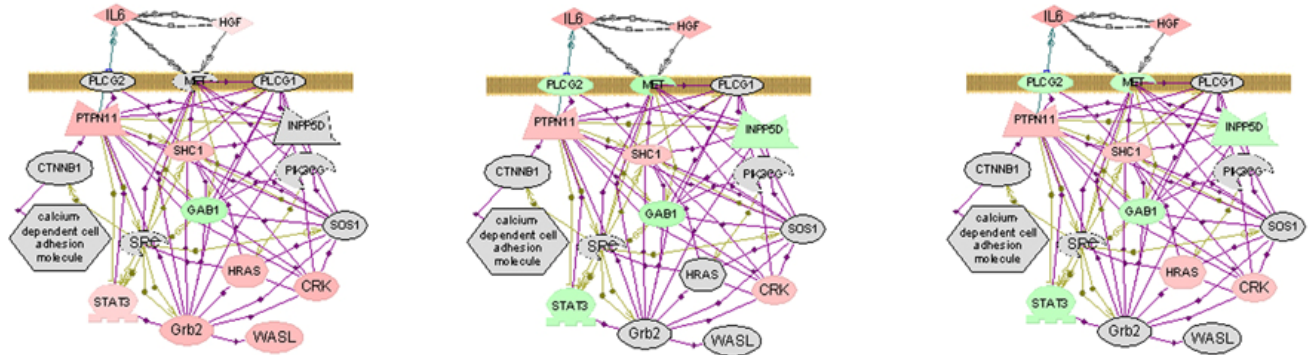

b. EGF and TGF- $\alpha$  signaling

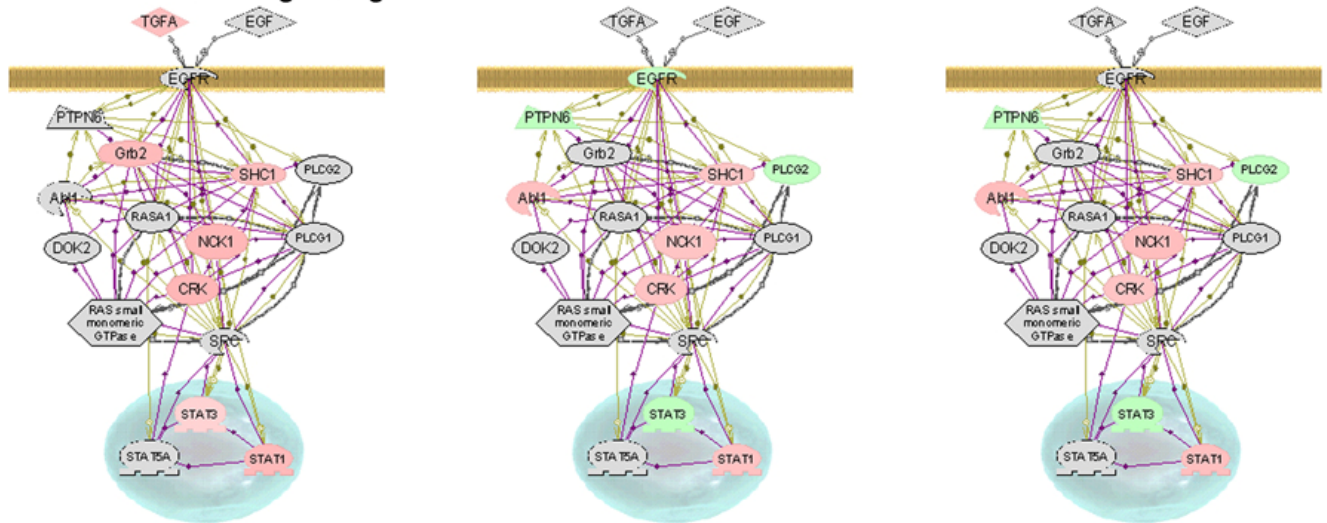

c. PDGF signaling

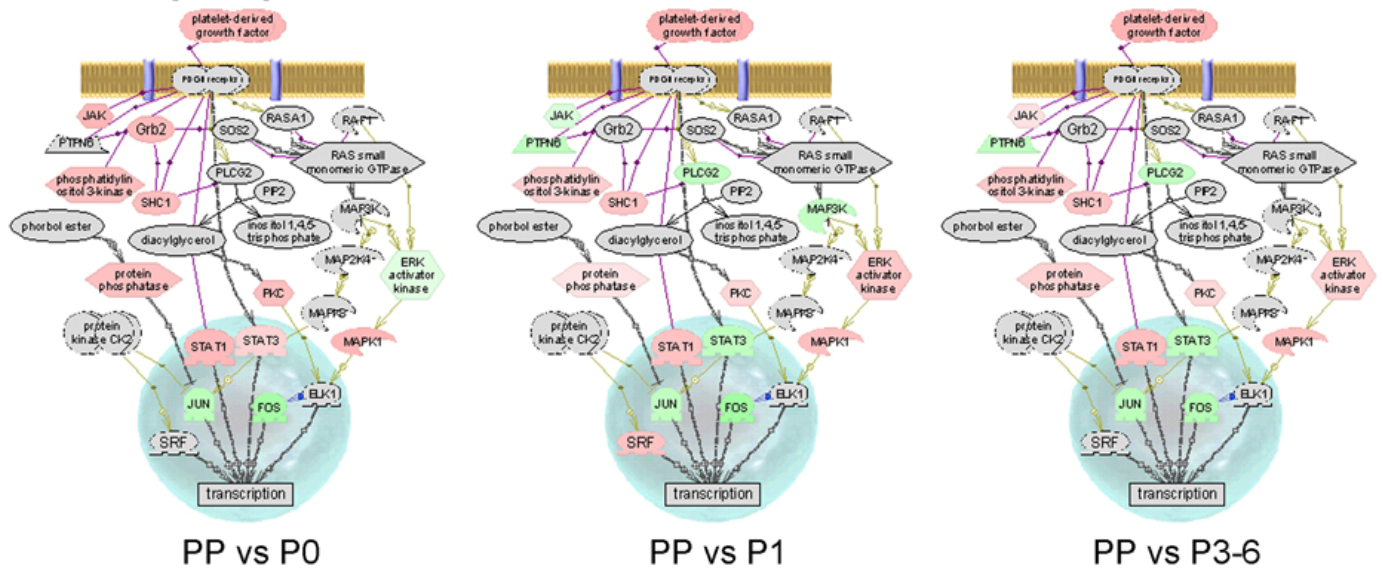

**Fig. S6. Microarray analysis showing changes in HGF, EGF/TGF- $\alpha$  and PDGF signaling.**

The data were obtained by PathwayStudio analysis and represent genes expressed better in PP cells (pink) or less well in PP cells (green). Boxes in grey indicate genes that were not in the query lists of differentially expressed genes. Panel a shows regulation of several critical members transducing HGF signaling in cultured cells compared with PP cells. These included c-Met and phospholipase C gamma 2 (PLCG2) receptors, inositol phosphate-5-phosphatase D (INPP5D), the adapter molecule GRB2 (growth factor receptor bound 2), the docking protein GAB1 (GRB2-associated binding protein1), which recruits phosphatidylinositol-3 kinase, STAT3 (signal transducer and activator of transcription-3), which directs the acute phase response, and WASL (Wiskott-Aldrich syndrome-like) gene, which can regulate actin polymerization. Similarly, as shown in Panel b, TGF- $\alpha$  and EGF/TGF- $\alpha$  receptor were regulated during cell culture with perturbations in STAT3 expression. By contrast, as shown in Panel c, PDGF signaling seemed to be mostly unperturbed in fetal cells.



**Fig. S7**

**a FGFR1 signaling**

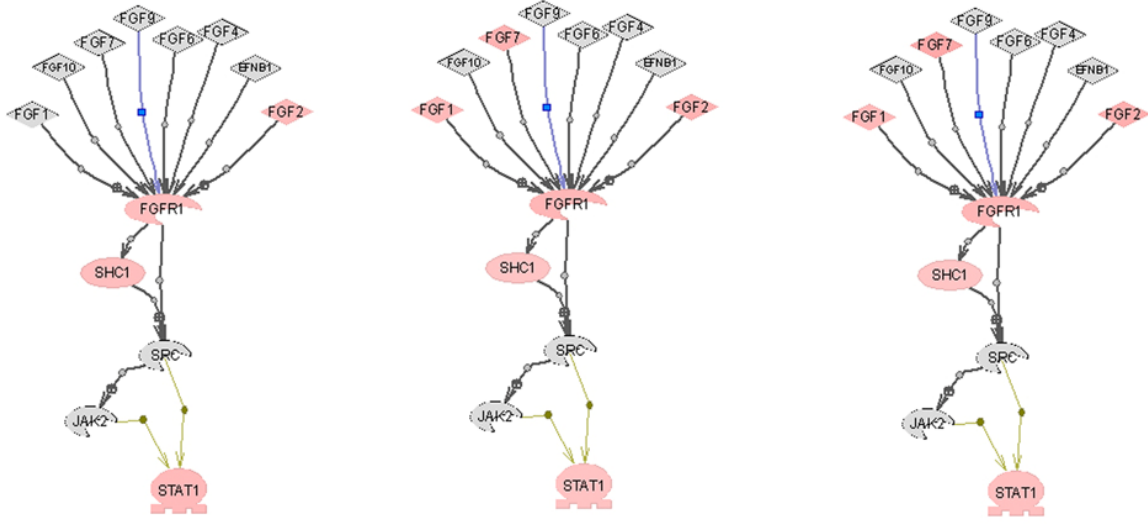

**b FGFR2 signaling**

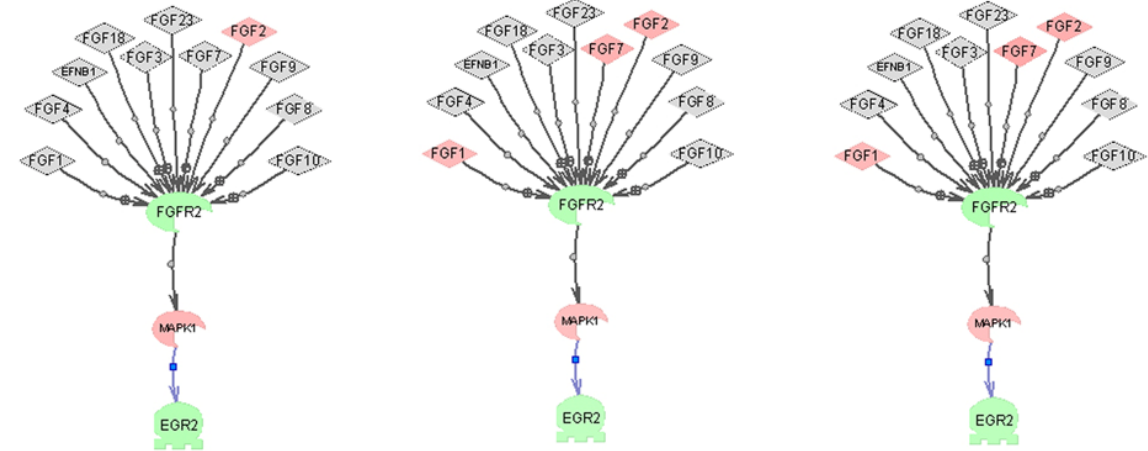

**c FGFR3 signaling**

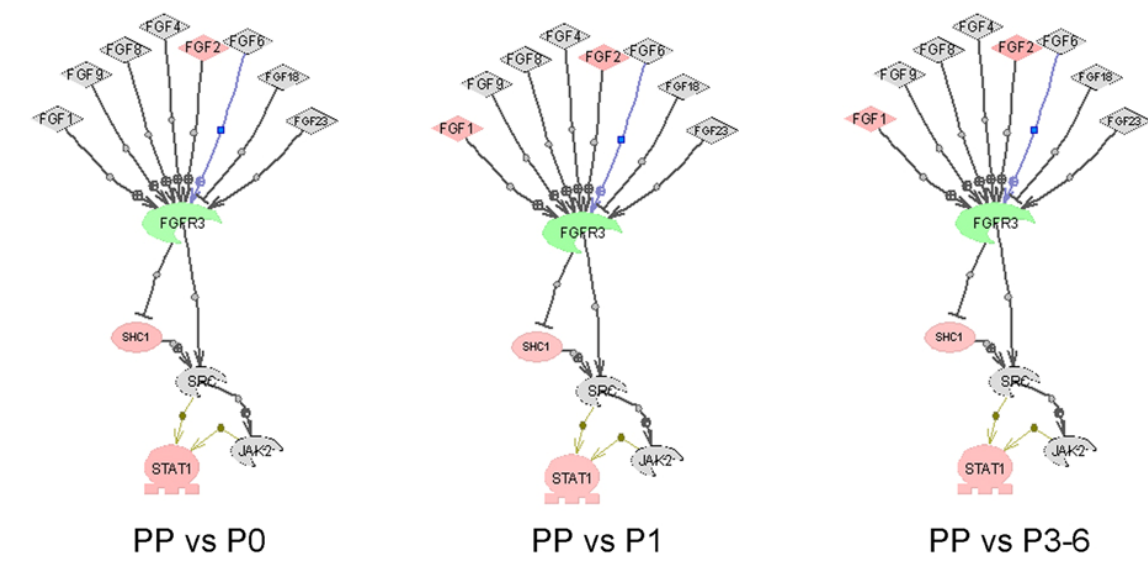



**Fig. S7. Regulation of FGF receptor pathways in fetal liver cells.** These data demonstrate the overall regulation of FGF receptor pathways in PP cells vs cultured cells. Genes expressed better in PP cells are in pink, expressed less well in PP are in green, and those not represented in the lists are in grey. Panel a shows that FGFR1 was expressed better in PP cells, although in contrast with P0 cells, FGF-1 and FGF-7 were expressed at lower levels in P1 and P3-6 cells. By contrast, FGFR2 and FGFR3 were less well expressed in PP cells. FGFR2 signaling appeared to be associated with superior expression of the downstream EGR2 (early growth response-2) gene in cultured cells versus PP cells.

Fig. S8

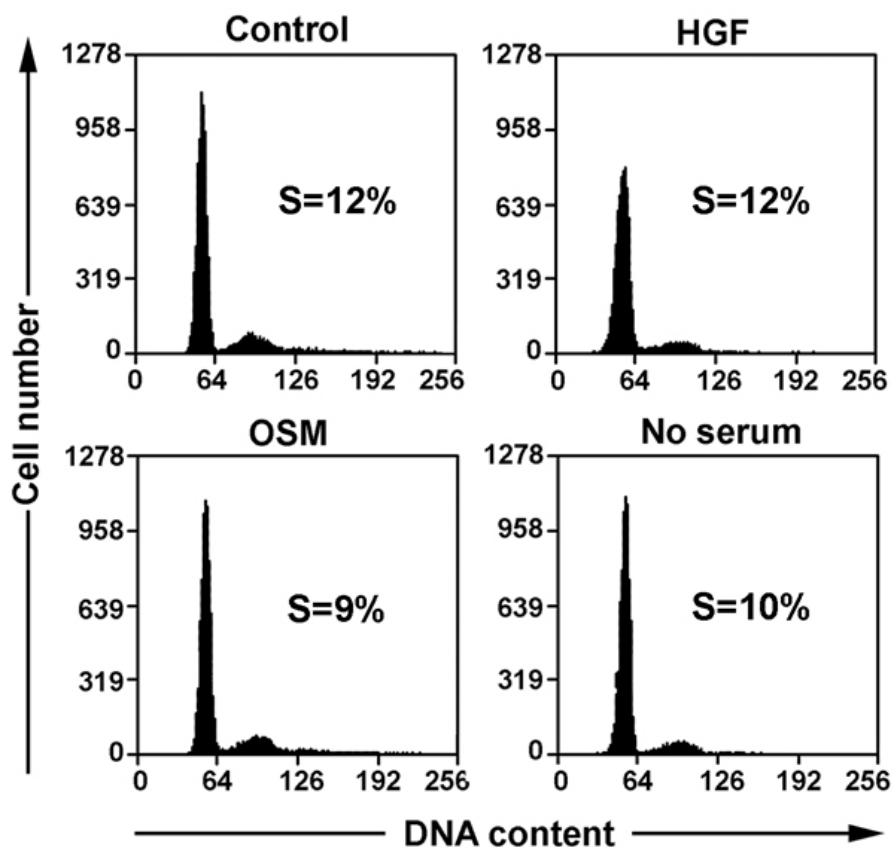

**Fig. S8. Cell cycle profiles during various manipulations.** The data were from P3 fetal cells shown in main Fig. 8. The flow cytometric profiles of cells with FBS (control) or after treatment with HGF, OSM or no serum were similar. These findings excluded the possibility that altered cell proliferation confounded changes in gene expression under these conditions.

**Table S1**  
**Gene expression profiles in sorted fetal liver cells**

| Marker                 | Ep-CAM-positive fraction | Ep-CAM-negative fraction |
|------------------------|--------------------------|--------------------------|
| <b>Hepatic markers</b> |                          |                          |
| Albumin                | 64±9% *                  | 5±2%                     |
| AFP                    | 38±5% *                  | 3±2%                     |
| Glycogen               | 57±8% *                  | 8±4%                     |
| <b>Biliary markers</b> |                          |                          |
| CK-19                  | 72±9% *                  | 2±1%                     |
| GGT                    | 51±6% *                  | 6±3%                     |
| DPPIV                  | 52±5% *                  | 0.2±0.3%                 |
| Alkaline phosphatase   | 8±4%                     | ND                       |

P<0.001 vs. Ep-CAM-negative fraction, ANOVA; ND = not done

**Table S2. Immunostaining protocols**

| Antigen                        | Fixation     | Blocking                                   | Primary Antibody                                           | Dilution | Secondary Antibody                                                          | Dilution | Color development | Counter-stain |
|--------------------------------|--------------|--------------------------------------------|------------------------------------------------------------|----------|-----------------------------------------------------------------------------|----------|-------------------|---------------|
| <b>AFP</b>                     | 4% PAF, RT   | 3% Goat serum                              | MFCD00162111 (#A8452, Sigma)                               | 1:500    | Peroxidase-conjugated anti-mouse IgG (#A3682, Sigma)                        | 1:200    | DAB               | -             |
| <b>Alb</b>                     | 4% PAF, RT   | 3% Goat serum                              | HSA-11 clone (#A6684, Sigma)                               | 1:1000   | FITC-conjugated IgG (#F9137, Sigma)                                         | 1:300    | -                 | DAPI          |
| <b>Alb</b>                     | 4% PAF, RT   | 3% Goat serum                              | IgG fraction antiserum (#A0433, Sigma)                     | 1:1000   | FITC-conjugated IgG (#F0382, Sigma)                                         | 1:300    | -                 | -             |
| <b>CK-19</b>                   | 4% PAF, RT   | 3% Goat serum                              | RPN 1165 (Amersham Pharmacia Biotech Inc., Piscataway, NJ) | 1:100    | Peroxidase-conjugated IgG (#A3682, Sigma)                                   | 1:200    | DAB               | -             |
| <b>CK-19</b>                   | 4% PAF, RT   | 5% Donkey serum                            | RPN 1165 (Amersham Pharmacia Biotech)                      | 1:100    | Rhodamine-conjugated IgG (#715-295-150, Jackson ImmunoRes., West Grove, PA) | 1:500    | -                 | DAPI          |
| <b>Ep-CAM</b>                  | 4% PAF, RT   | 5% Donkey serum                            | MCA850H (Serotec Ltd., Raleigh, NC)                        | None     | Rhodamine-conjugated anti mouse IgG (#715-295-150, Jackson Immuno Research) | 1:500    | -                 | DAPI          |
| <b>GFP</b>                     | 4% PAF, RT   | 5% goat serum<br>1% BSA, 0.1% Triton X-100 | Rabbit anti-GFP (#A-6455, Molecular Probes, Eugene, OR)    | 1:300    | FITC-conjugated anti-rabbit IgG (#F0382, Sigma)                             | 1:40     | -                 | DAPI          |
| <b>Ki-67</b>                   | Ethanol, 4°C | 3% Goat serum                              | Mouse monoclonal (#550609, Pharmingen Inc., San Diego)     | 1:25     | Peroxidase-conjugated anti-mouse IgG (#A3682, Sigma)                        | 1:200    | DAB               | -             |
| <b><math>\alpha</math>-SMA</b> | 4% PAF, RT   |                                            | Anti- $\alpha$ smooth muscle-Cy3™ (#C6198, Sigma)          | 1:800    | -                                                                           | -        | -                 | DAPI          |
| <b>Vimentin</b>                | 4% PAF, RT   | 5% Donkey serum                            | V212210 (United States Biological, Swampscott, MA)         | 1:100    | Rhodamine-conjugated anti mouse IgG (#715-295-150, Jackson Immuno Research) | 1:500    | -                 | DAPI          |
| <b>Common</b>                  | 10 min       | 1 h, RT                                    | 2 h incubation, RT                                         | -        | 1 h incubation, RT                                                          | -        | -                 | -             |

RT= room temperature; PFA= paraformaldehyde; DAPI = 4',6-Diamidino-2-phenylindole; DAB = diaminobenzidine



**Table S3. PCR Primers**

| Gene                                     | Primer pairs (5'-3'; Forward and Reverse)             | Tm (°C) | Product (bp) | Reference                                       |
|------------------------------------------|-------------------------------------------------------|---------|--------------|-------------------------------------------------|
| <b>ABCG-2</b>                            | GGGTTCTCTTCTTCCTGACGACC<br>TGGTTGTGAGATTGACCAACAGACC  | 65      | 398          | CW Scharenberg et al. Blood 2002;99: 507        |
| <b>Alb</b>                               | TGCTTGAATGTGCTGATGACAGGG<br>AAGGCAAGTCAGCAGGCATCTCATC | 60      | 160          | R Schwartz et al. J Clin Invest 2002; 109: 1291 |
| <b>AFP</b>                               | TGCAGCCAAAGTGAAGAGGGAAGA<br>CATAGCGAGCAGCCCAAAGAAGAA  | 60      | 160          | R Schwartz et al. J Clin Invest 2002; 109: 1291 |
| <b><math>\beta</math>-Actin</b>          | AGAGCTATGAGCTGCCTGAC<br>CTGATCCACATCTGCTGGAA          | 65      | 361          | Y. Heremans et al. J Cell Biol 2002;159: 303    |
| <b><math>\beta</math>2-microglobulin</b> | AGCAAGGACTGGTCTTT<br>CTCGATCCCCTTA ACTATCT            | 54      | 124          | Current authors (MI)                            |
| <b>CK-19</b>                             | ATGGCCGAGCAGAACCGGAA<br>CCATGAGCCGCTGGTACTCC          | 60      | 308          | R Schwartz et al. J Clin Invest 2002; 109: 1291 |
| <b>E-Cadherin</b>                        | TTGGTCTACGCCTGGG<br>AGTTGGGAAATGTGAGCA                | 60      | 139          | Current authors (MI)                            |
| <b>EGF receptor</b>                      | ATTCCGAGACGAAGCC<br>CACGAGCCGTGATCTG                  | 60      | 162          | Current authors (MI)                            |
| <b>Frizzled-1</b>                        | GAAC TTCTCCA ACTTCATGGC<br>CATTCCATTTTACAGACCGG       | 60      | 398          | YW Qiang et al. Oncogene 2003;22:1536           |
| <b>Frizzled -2</b>                       | GGTGAGCCAGCACTGCAAGAG<br>CCTAAAAGTGAAATGGTTTCGATCG    | 60      | 310          | YW Qiang et al. Oncogene 2003;22:1536           |
| <b>Frizzled -3</b>                       | GCTG TACTCACAGTTAACATG<br>GCTAAAATACCCTTGCTGATTT      | 45      | 450          | YW Qiang et al. Oncogene 2003;22:1536           |
| <b>Frizzled -4</b>                       | TGC TTTTCAGGGCAAAGTG<br>ACAGGAAGAGATTTATGGAATG        | 55      | 378          | YW Qiang et al. Oncogene 2003;22:1536           |
| <b>Frizzled -5</b>                       | TACCCAGCCTGTCGCTAAAC<br>AAAACCGTCCAAAGATAAACTGC       | 55      | 247          | YW Qiang et al. Oncogene 2003;22:1536           |
| <b>Frizzled -6</b>                       | ACATCTCTGCTTGTTTAC<br>GATCTGTGAAATTCCTAA              | 45      | 732          | YW Qiang et al. Oncogene 2003;22:1536           |
| <b>Frizzled -7</b>                       | GTTTGGATGAAAAGATTT CAGGC<br>GACCACTGCTTGACAAGCACAC    | 60      | 294          | YW Qiang et al. Oncogene 2003;22:1536           |
| <b>Frizzled -8</b>                       | ACAGTGTGATTGCTATTAGCATG<br>GTGAAATCTGTGTATCTGACTGC    | 55      | 268          | YW Qiang et al. Oncogene 2003;22:1536           |
| <b>Frizzled -9</b>                       | CCCTAGAGACAGCTGACTAGCAG<br>CGGGGGTTTATTCCAGTCACAGC    | 60      | 270          | YW Qiang et al. Oncogene 2003;22:1536           |

|                                         |                                                          |    |     |                                                            |
|-----------------------------------------|----------------------------------------------------------|----|-----|------------------------------------------------------------|
| <b>Frizzled -10</b>                     | ACACGTCCAACGCCAGCATG<br>ACGAGTCATGTTGTAGCCGATG           | 60 | 160 | YW Qiang et al. Oncogene 2003;22:1536                      |
| <b>HNF-1<math>\alpha</math></b>         | GTGTCTACAACCTGGTTTGCC<br>TGTAGACACTGTCACTAAGG            | 52 | 251 | I Lemm I. et al. Mol Carcinogenesis 1999;<br>24:305        |
| <b>HNF-1<math>\beta</math></b>          | GAAACAATGAGATCACTTCCTCC<br>CTTTGTGCAATTGCCATGACTCC       | 56 | 374 | I Lemm et al. Mol Carcinogenesis 1999; 24:305              |
| <b>HNF-3<math>\alpha</math></b>         | CAACATGTTTCGAGAACGGCT<br>CCACTGTGGTCCAGAGTCTG            | 56 | 263 | RK Giri (unpublished)                                      |
| <b>HNF-3<math>\beta</math></b>          | CACCCTACGCCTTAACCAC<br>GGTAGTAGGAGGTATCTGCGG             | 52 | 235 | Current authors (MI)                                       |
| <b>HNF-4</b>                            | CTGCTCGGAGCCACAAAGAGATCCATG<br>ATCATCTGCCACGTGATGCTCTGCA | 58 | 370 | L Suaud et al. Biochem Biophys Res Commun<br>1997;235: 820 |
| <b>HGF</b>                              | ACCACACGAACACAGC<br>AGACTTCGTAGCGTACC                    | 60 | 134 | Current authors (MI)                                       |
| <b>c-Met</b>                            | ACAACCCGAATACTGCC<br>AGGATACGGAGCGACA                    | 54 | 190 | Current authors (MI)                                       |
| <b>Nanog</b>                            | AGAACTCTCCAACATCCTG<br>GGTAGGTAGGTGCTG                   | 54 | 147 | Current authors (MI)                                       |
| <b>Notch-1</b>                          | GCGGCCGCCTTTGTGGTTCTGTTC<br>GCCGGCGCGTCCTCTCTTCC         | 65 | 500 | J. Walsh et al. APMIS, 2003; 111: 197-210                  |
| <b>Notch-2</b>                          | TCGTGCAAGAGCCAGTTACCC<br>AATGTCATGGCCGCTTCAGAG           | 65 | 530 | J. Walsh et al. APMIS, 2003; 111: 197-210                  |
| <b>Oct-4</b>                            | AGTGAGAGGCAACCTG<br>CGTTGTGCAAGTCGC                      | 53 | 165 | Current authors (MI)                                       |
| <b><math>\alpha</math>-SMA</b>          | AGTACCCGATAGAACATGG<br>TTTTCTCCCGGTTGGC                  | 60 | 153 | Current authors (MI)                                       |
| <b>TGF-<math>\beta</math>1</b>          | TGATGTCACCGGAGTTG<br>GAACCCGTTGATGTCCA                   | 58 | 124 | Current authors (MI)                                       |
| <b>TGF-<math>\beta</math>2</b>          | CAACAGACCAACCGGC<br>GTACCCTTTGGGTTTCGT                   | 58 | 144 | Current authors (MI)                                       |
| <b>TGF-<math>\beta</math>1 Receptor</b> | CGTGCTGACATCTATGCAAT<br>AGCTGCTCCATTGGCATAAC             | 54 | 251 | U Wulbrand et al. Eur J Clin Invest 1998;<br>28:1038       |
| <b>TGF-<math>\beta</math>2 Receptor</b> | TGCGTCTGGACCCTAC<br>ACTGCATTACAGCGAGAT                   | 58 | 187 | RK Giri (unpublished)                                      |
| <b>Vimentin</b>                         | CACCTACAGCCTCTACG<br>AGCGGTCATTACAGCTC                   | 60 | 170 | Current authors (MI)                                       |
